# Supplementary material for: Exploring distribution and genomic diversity of begomoviruses associated with yellow mosaic disease of legume crops from India, highlighting the dominance of mungbean yellow mosaic India virus
Source: Front Microbiol. 2024 Aug 27;15:1451986. doi: 10.3389/fmicb.2024.1451986 (PMC11385007; doi:10.3389/fmicb.2024.1451986)
Supplement: Supplementary file 9 [file Table_5.XLSX]

## Sheet: 167
Supplementary Table S5: List of additional begomoviruses considered for the phylogenetic analysis.
Sl.No.	DNA-A: RefSeq Accession	DNA-B: RefSeq Accession	Begomovirus	Abbreviation	Isolate
1	DNA-A: NC_015045	DNA-B: NC_015048	Abutilon mosaic Bolivia virus	AbMBoV	Bolivia/2007
2	DNA-A: NC_016574	DNA-B: NC_016577	Abutilon mosaic Brazil virus	AbMBV	Brazil/BGV01A.1.C21
3	DNA-A: NC_001928	DNA-B: NC_001929	Abutilon mosaic virus	AbMV	Germany
4	DNA-A: NC_055128	DNA-B: NC_055127	African cassava mosaic Burkina Faso virus	ACMBFV	BF-Oua-127-08
5	DNA-A: NC_001467	DNA-B: NC_001468	African cassava mosaic virus	ACMV	Cameroon/1998
6	DNA-A: NC_024009	DNA-B: NC_040180	Allamanda leaf mottle distortion virus	AllLMoDV	India-Al_K1-2012
7	DNA-A: NC_026514	DNA-B: NC_026513	Asystasia mosaic Madagascar virus	AsMMV	Madagascar-MG493-2011
8	DNA-A: NC_055594	DNA-B: NC_060095	Bean bushy stunt virus	BBSV	AR- General Mosconi-17
9	DNA-A: NC_003504	DNA-B: NC_003505	Bean calico mosaic virus	BChV	Mexico/Sonora/1986
10	DNA-A: NC_019569	DNA-B: NC_019568	Bean chlorosis virus	BChMV	Venezuela/LaBarinesa459/2006
11	DNA-A: NC_001931	DNA-B: NC_001930	Bean dwarf mosaic virus	BDMV	Colombia/1987
12	DNA-A: NC_004042	DNA-B: NC_004043	Bean golden mosaic virus	BGMV	Brazil/Campinas 1/1978
13	DNA-A: NC_038791	DNA-B: NC_038790	Bean golden yellow mosaic virus	BGYMV	Dominican Republic/1987
14	DNA-A: NC_055589	DNA-B: NC_060091	Bean latent virus	BLV	MX-Nayarit CN30-14
15	DNA-A: NC_043524	DNA-B: NC_060104	Bean leaf crumple virus	BLCrV	CO-HA-15
16	DNA-A: NC_022005	DNA-B: NC_022003	Bean white chlorosis mosaic virus	BWCMV	JN848772
17	DNA-A: NC_055540	DNA-B: NC_055539	Bitter gourd yellow mosaic virus	BgYMV	IN-17
18	DNA-A: NC_010837	DNA-B: NC_010838	Blainvillea yellow spot virus	BlYSV	Brazil/Coi25/2007
19	DNA-A: NC_019035	DNA-B: NC_019036	Blechum interveinal chlorosis virus	BleICV	Mexico/Campeche/2011
20	DNA-A: NC_038792	DNA-B: NC_038793	Cabbage leaf curl Jamaica virus	CabLCJV	Jamaica/CUc3/2005
21	DNA-A: NC_003866	DNA-B: NC_003887	Cabbage leaf curl virus	CabLCV	United States/Florida/1996
22	DNA-A: NC_022007	DNA-B: NC_022008	Capraria yellow spot virus	CarYSV	Mexico/Yucatan/Conkal/2007
23	DNA-A: NC_017004	DNA-B: NC_017005	Cassava mosaic Madagascar virus	CMMGV	Madgascar/Toliary/2006
24	DNA-A: NC_003830	DNA-B: NC_003831	Chino del tomate virus	CdTV/To	Mexico/Sinaloa IC/1983/Tomato
25	DNA-A: NC_016578	DNA-B: NC_016572	Cleome leaf crumple virus	CleLCrV	Brazil/BgV05A.1.C75
26	DNA-A: NC_010713	DNA-B: NC_010714	Clerodendron golden mosaic virus	ClGMV	Vietnam/Sonla/2005
27	DNA-A: NC_011346	DNA-B: NC_011347	Clerodendrum golden mosaic China virus	ClGMCNV/Fu	China/Fuzhou 7/2007/Fuzon
28	DNA-A: NC_038982	DNA-B: NC_040184	Cnidoscolus mosaic leaf deformation virus	CnMLDV	Brazil-Mes3-2015
29	DNA-A: NC_024810	DNA-B: NC_024809	Coccinia mosaic Tamil Nadu virus	CMTNV	India-TDVCoc1-2013
30	DNA-A: NC_038988	DNA-B: NC_040189	Common bean mottle virus	CBMoV	Cuba-May6-2014
31	DNA-A: NC_031961	DNA-B: NC_040190	Common bean severe mosaic virus	CBSMV	Cuba-May99-2014
32	DNA-A: NC_009644	DNA-B: NC_009646	Corchorus golden mosaic virus	CoGMV/Ha	Vietnam/Hanoi/2005/Hanoi
33	DNA-A: NC_008492	DNA-B: NC_008493	Corchorus yellow spot virus	CoYSV	Mexico/Yucatan/2005
34	DNA-A: NC_078184	DNA-B: NC_078183	Corchorus yellow vein Cuba virus	CoYVCUV	CU-Co705-1-13
35	DNA-A: NC_006358	DNA-B: NC_006359	Corchorus yellow vein virus	CoYVV	Vietnam/Hoa Binh/2000
36	DNA-A: NC_038794	DNA-B: NC_038795	Cotton chlorotic spot virus	CoChSpV	Brazil/CampinaGrandeB012/2009
37	DNA-A: NC_004580	DNA-B: NC_004581	Cotton leaf crumple virus	CLCrV/AZ	Mexico/Sonora/1991/Arizona
38	DNA-A: NC_030310	DNA-B: NC_030311	Cotton yellow mosaic virus	CYMV	Benin-Gos_San2-2014
39	DNA-A: NC_055489	DNA-B: NC_055490	Cowpea bright yellow mosaic virus	CoBYMV	BR-PE–088-11
40	DNA-A: NC_055464	DNA-B: NC_055463	Croton golden mosaic virus	CroGMV	CO-Fl_Va-14
41	DNA-A: NC_055582	DNA-B: NC_060103	Cucumber chlorotic leaf virus	CuChLV	MX-Colima-18
42	DNA-A: NC_002984	DNA-B: NC_002985	Cucurbit leaf crumple virus	CuLCrV	United States/Arizona/1991
43	DNA-A: NC_018716	DNA-B: NC_018718	Dalechampia chlorotic mosaic virus	DaChMV	Venezuela/Albarico1020/2007
44	DNA-A: NC_018717	DNA-B: NC_018715	Datura leaf distortion virus	DaLDV	Venezuela/Rubio 933/2007
45	DNA-A: NC_029804	DNA-B: NC_029803	Deinbollia mosaic virus	DMV	Tanzania-DB_T1A-2015
46	DNA-A: NC_008494	DNA-B: NC_008495	Desmodium leaf distortion virus	DesLDV	Mexico/Yucatan/2005
47	DNA-A: NC_003856	DNA-B: NC_003857	Dicliptera yellow mottle virus	DiYMoV	United States/Florida/1998
48	DNA-A: NC_004625	DNA-B: NC_004630	East African cassava mosaic Cameroon virus	EACMCMV	Cameroon/1998
49	DNA-A: NC_011583	DNA-B: NC_011584	East African cassava mosaic Kenya virus	EACMKV	Kenya/Mitaboni/K298/2002
50	DNA-A: NC_004674	DNA-B: NC_004676	East African cassava mosaic virus	EACMV/UG	Uganda/Severe 2/1997/Uganda
51	DNA-A: NC_004655	DNA-B: NC_004656	East African cassava mosaic Zanzibar virus	EACMZV	Tanzania/Uguja/1998
52	DNA-A: NC_008304	DNA-B: NC_008305	Euphorbia mosaic virus	EuMV	Mexico/Yucatan/2004
53	DNA-A: NC_012553	DNA-B: NC_012554	Euphorbia yellow mosaic virus	EuYMV	Brazil/2008
54	DNA-A: NC_055521	DNA-B: NC_055522	Hibiscus golden mosaic virus	HGMV	BR-IgM1-16
55	DNA-A: NC_055543	DNA-B: NC_060098	Hybanthus yellow mosaic virus	HybYMV	CO-Valle-14
56	DNA-A: NC_001932	DNA-B: NC_001933	Indian cassava mosaic virus	ICMV/IN	India/Trivandrum/1986/India
57	DNA-A: NC_038796	DNA-B: NC_038797	Jacquemontia mosaic Yucatan virus	JacMYuV	Mexico/Yucatan/2007
58	DNA-A: NC_038960	DNA-B: NC_040181	Jacquemontia yellow mosaic virus	JacYMV	Venezuela-RC1250-09
59	DNA-A: NC_043526	DNA-B: NC_050697	Jacquemontia yellow vein virus	JacYVV	VE-Zu 1915_1-10
60	DNA-A: NC_024012	DNA-B: NC_024013	Jatropha mosaic virus	JMV	Jamaica/Spanish Town 1/2004
61	DNA-A: NC_004824	DNA-B: NC_004825	Luffa yellow mosaic virus	LYMV	Vietnam
62	DNA-A: NC_038978	DNA-B: NC_040187	Lycianthes yellow mosaic virus	LyYMV	China-GD-2015
63	DNA-A: NC_031448	DNA-B: NC_031453	Macroptilium common mosaic virus	MacCMV	Brazil-ALM2_5B-09
64	DNA-A: NC_010952	DNA-B: NC_010953	Macroptilium golden mosaic virus	MacGMV	Jamaica/ Augusta Town/2004
65	DNA-A: NC_004097	DNA-B: NC_004098	Macroptilium mosaic Puerto Rico virus	MacMPRV	Puerto Rico/1990
66	DNA-A: NC_004099	DNA-B: NC_004100	Macroptilium yellow mosaic Florida virus	MacYMFV	United States/Florida/1985
67	DNA-A: NC_010647	DNA-B: NC_010648	Macroptilium yellow mosaic virus	MacYMV/JM	Jamaica/Mona/2006/Jamaica
68	DNA-A: NC_031458	DNA-B: NC_031459	Malvastrum bright yellow mosaic virus	MaBYMV	United States-Ma8S-2014
69	DNA-A: NC_038798	DNA-B: NC_038799	Malvastrum yellow mosaic Jamaica virus	MaYMJV	Jamaica/179A73/2003
70	DNA-A: NC_028140	DNA-B: NC_028141	Melochia mosaic virus	MelMV	Brazil-CorB25-2014
71	DNA-A: NC_028142	DNA-B: NC_028143	Melochia yellow mosaic virus	MelYMV	Brazil-CorB26-2014
72	DNA-A: NC_003865	DNA-B: NC_003860	Melon chlorotic leaf curl virus	MCLCuV/CR	Costa Rica/Guanacaste/1998/Costa Rica
73	DNA-A: NC_014380	DNA-B: NC_014381	Melon chlorotic mosaic virus	MClMV	Venezuela/Watermelon/2009
74	DNA-A: NC_015490	DNA-B: NC_015491	Merremia mosaic Puerto Rico virus	MerMPRV	Puerto Rico/89/1998
75	DNA-A: NC_007965	DNA-B: NC_007966	Merremia mosaic virus	MerMV/PR	Puerto Rico/Puerto Rico
76	DNA-A: NC_055591	DNA-B: NC_060092	Ocimum golden mosaic virus	OcGMV	UG-UG31-2015
77	DNA-A: NC_055593	DNA-B: NC_060094	Ocimum mosaic virus	OcMV	UG-UG31-2015
78	DNA-A: NC_055592	DNA-B: NC_060093	Ocimum yellow vein virus	OcYVV	UG-UG14-2015
79	DNA-A: NC_011181	DNA-B: NC_011182	Okra mottle virus	OMoV	Brazil/6319/2008
80	DNA-A: NC_014066	DNA-B: NC_014067	Okra yellow mosaic Mexico virus	OYMV	Mexico/Mazatepec 3/2004
81	DNA-A: NC_031764	DNA-B: NC_031765	Passionfruit leaf distortion virus	PLDV	Colombia-Valle-2014
82	DNA-A: NC_012786	DNA-B: NC_012787	Passionfruit severe leaf distortion virus	PSLDV	Brazil/LSN 2/2001
83	DNA-A: NC_038981	DNA-B: NC_040185	Pavonia mosaic virus	PavMV	Brazil-Cor40-2014
84	DNA-A: NC_029105	DNA-B: NC_037611	Pavonia yellow mosaic virus	PavYMV	Brazil-Alb51-2014
85	DNA-A: NC_055596	DNA-B: NC_060096	Pepper blistering leaf virus	PepBLV	AR-Salta-Oran-Pepper663-2014
86	DNA-A: NC_004101	DNA-B: NC_004096	Pepper golden mosaic virus	PepGMV/Tam	Mexico/Tamaulipas/Tamaulipas
87	DNA-A: NC_001359	DNA-B: NC_001369	Pepper huasteco yellow vein virus	PHYVV	Mexico/Tamaulipas
88	DNA-A: NC_043517	DNA-B: NC_050698	Pepper leafroll virus	PepLRV	PE-P107-pep-09
89	DNA-A: NC_055516	DNA-B: NC_055517	Pepper yellow leaf curl Aceh virus	PepYLCAV	ID-BAPep-V2-17
90	DNA-A: NC_008283	DNA-B: NC_008284	Pepper yellow leaf curl Indonesia virus	PepYLCIV	Indonesia/2005
91	DNA-A: NC_028989	DNA-B: NC_040186	Pepper yellow leaf curl Thailand virus	PepYLCTHV	Thailand-WF_SPN_Pep-2015
92	DNA-A: NC_002048	DNA-B: NC_002049	Potato yellow mosaic Panama virus	PYMPV	Panama/Divisa/Tomato/1996
93	DNA-A: NC_001934	DNA-B: NC_001935	Potato yellow mosaic virus	PYMV/Po	Venezuela/1991/Potato
94	DNA-A: NC_038800	DNA-B: NC_038801	Rhynchosia golden mosaic Havana virus	RhGMHaV	Cuba/Havana/2007
95	DNA-A: NC_038802	DNA-B: NC_038803	Rhynchosia golden mosaic Sinaloa virus	CabLCV	Mexico/Sinaloa/2005
96	DNA-A: NC_037306	DNA-B: NC_037305	Rhynchosia golden mosaic virus	RhGMV/MX	Mexico/Sinaloa/2005/Mexico
97	DNA-A: NC_015488	DNA-B: NC_015489	Rhynchosia mild mosaic virus	RhMMV	Puerto Rico/PR79/1997
98	DNA-A: NC_038805	DNA-B: NC_038804	Rhynchosia rugose golden mosaic virus	RhRGMV	Cuba/Camaguey/2009
99	DNA-A: NC_031456	DNA-B: NC_031457	Sida angular mosaic virus	SiAMV	Brazil-ALS30_4C-2014
100	DNA-A: NC_038991	DNA-B: NC_040191	Sida bright yellow mosaic virus	SiBYMV	Brazil-Tac720-2010
101	DNA-A: NC_055581	DNA-B: NC_060102	Sida chlorotic leaf virus	SiChLV	MX-Colima-18
102	DNA-A: NC_031455	DNA-B: NC_031454	Sida chlorotic vein virus	SiCVV	Brazil-BALS15_2C-2008
103	DNA-A: NC_038456	DNA-B: NC_049200	Sida ciliaris golden mosaic virus	SicGMV	Venezuela/Lara/M3/2009
104	DNA-A: NC_014794	DNA-B: NC_014795	Sida golden mosaic Buckup virus	SiGMBuV	Jamaica/St Elizabeth 1/2004
105	DNA-A: NC_004657	DNA-B: NC_004658	Sida golden mosaic Costa Rica virus	SiGMCRV	Costa Rica
106	DNA-A: NC_014446	DNA-B: NC_014447	Sida golden mosaic Florida virus	SiGMFlV/Malv	Cuba/Havana/Malvastrum/111/2009/Florida
107	DNA-A: NC_002046	DNA-B: NC_002047	Sida golden mosaic virus	SiGMV	United States/Florida
108	DNA-A: NC_014130	DNA-B: NC_014128	Sida golden mottle virus	SiGMoV	United States/Florida/Bradenton/1997
109	DNA-A: NC_055602	DNA-B: NC_060097	Sida interveinal bright yellow virus	SiIBYV	MX- Conca 1-18
110	DNA-A: NC_005330	DNA-B: NC_005331	Sida micrantha mosaic virus	SiMMV	Brazil/A2B2
111	DNA-A: NC_016573	DNA-B: NC_016579	Sida mosaic Alagoas virus	SiMALV	Brazil/BgV02A1C59
112	DNA-A: NC_015046	DNA-B: NC_015044	Sida mosaic Bolivia virus 1	SiMBoV1	Bolivia/Sida micrantha/2007
113	DNA-A: NC_015043	DNA-B: NC_015047	Sida mosaic Bolivia virus 2	SiMBoV2	Bolivia/Sida micrantha/2007
114	DNA-A: NC_008059	DNA-B: NC_008056	Sida mosaic Sinaloa virus	SiMSiV	Mexico/Guasave/2006
115	DNA-A: NC_055548	DNA-B: NC_060100	Sida yellow golden mosaic virus	SiYGMV	BR-SPI15-15
116	DNA-A: NC_008779	DNA-B: NC_008780	Sida yellow mosaic Yucatan virus	SiYMYuV	Mexico/Yucatan/2005
117	DNA-A: NC_016082	DNA-B: NC_016083	Sida yellow mottle virus	SiYMoV	Cuba/Sancti Spiritus159/1/2009
118	DNA-A: NC_004661	DNA-B: NC_004662	Sida yellow vein virus	SiYVV	Honduras/yellow vein
119	DNA-A: NC_024304	DNA-B: NC_024305	Solanum mosaic Bolivia virus	SoMBoV	Bolivia-2007
120	DNA-A: NC_003803	DNA-B: NC_003804	South African cassava mosaic virus	SACMV	South Africa
121	DNA-A: NC_007339	DNA-B: NC_007338	Squash leaf curl China virus	SLCCNV/CN	Vietnam/B/China
122	DNA-A: NC_005845	DNA-B: NC_005846	Squash leaf curl Philippines virus	SLCuPV	Philippines/Munoz
123	DNA-A: NC_001936	DNA-B: NC_001937	Squash leaf curl virus	SLCuV	United States/Imperial Valley/1979
124	DNA-A: NC_004645	DNA-B: NC_004646	Squash mild leaf curl virus	SMLCuV	United States/Imperial Valley/1979
125	DNA-A: NC_003861	DNA-B: NC_003862	Sri Lankan cassava mosaic virus	SLCMV/LK	Sri Lanka/Colombo/1998/Sri Lanka
126	DNA-A: NC_035887	DNA-B: NC_035888	Tobacco leaf curl Cuba virus	TbLCCUV	Cuba/VC/2015
127	DNA-A: NC_055514	DNA-B: NC_055515	Tobacco leaf curl Dominican Republic virus	TbLCDOV	DO-CG-15
128	DNA-A: NC_015627	DNA-B: NC_015628	Tobacco yellow crinkle virus	TbYCV	Cuba/2007
129	DNA-A: NC_055472	DNA-B: NC_055471	Tomato chlorotic leaf curl virus	ToCLCV	BR-Alt1-16
130	DNA-A: NC_015962	DNA-B: NC_015961	Tomato chlorotic leaf distortion virus	ToClLDV	Venezuela/Zulia/2004
131	DNA-A: NC_038965	DNA-B: NC_040183	Tomato chlorotic mottle Guyane virus	ToCMoGV	French Guyana-Mon2-GF455-2009
132	DNA-A: NC_003664	DNA-B: NC_003665	Tomato chlorotic mottle virus	ToCMoV/BA	Brazil/Seabra 1/1996/Bahia
133	DNA-A: NC_010835	DNA-B: NC_010836	Tomato common mosaic virus	ToCmMV	Brazil/Coimbra 22/2007
134	DNA-A: NC_016580	DNA-B: NC_016581	Tomato dwarf leaf virus	ToDfLV	Argentin/Pichanal 397/2008
135	DNA-A: NC_001507	DNA-B: NC_001508	Tomato golden mosaic virus	TGMV	Brazil/Common/1984
136	DNA-A: NC_008058	DNA-B: NC_008057	Tomato golden mottle virus	ToGMoV	Mexico/San Luiz Potosi/2005
137	DNA-A: NC_038807	DNA-B: NC_038806	Tomato golden vein virus	TGVV	Brazil/Ita1220/2003
138	DNA-A: NC_004558	DNA-B: NC_004559	Tomato leaf curl Gujarat virus	ToLCGUV	India/Varanasi/2001
139	DNA-A: NC_010791	DNA-B: NC_010792	Tomato leaf curl Hsinchu virus	ToLCHsV	China/Hainan/Ramie/2007
140	DNA-A: NC_004611	DNA-B: NC_004612	Tomato leaf curl New Delhi virus	ToLCNDV	India/New Delhi/Severe/1992
141	DNA-A: NC_010840	DNA-B: NC_010839	Tomato leaf curl Palampur virus	ToLCPalV	India/Palampur/2007
142	DNA-A: NC_009606	DNA-B: NC_009605	Tomato leaf curl Sinaloa virus	ToLCSiV	Nicaragua/Santa Lucia/NI2
143	DNA-A: NC_010833	DNA-B: NC_010834	Tomato mild mosaic virus	ToMMV	Brazil/Paty do Alferes 58/2005
144	DNA-A: NC_009490	DNA-B: NC_009491	Tomato mild yellow leaf curl Aragua virus	ToMYLCAV	Venezuela/10/2003
145	DNA-A: NC_003867	DNA-B: NC_003868	Tomato mosaic Havana virus	ToMHaV	Cuba/Quivican
146	DNA-A: NC_055587	DNA-B: NC_060090	Tomato mosaic severe dwarf virus	ToMSDV	BR-DF-640_AA_LVV-16
147	DNA-A: NC_001828	DNA-B: NC_001917	Tomato mottle Taino virus	ToMoTaV	Cuba
148	DNA-A: NC_001938	DNA-B: NC_001939	Tomato mottle virus	ToMoV	United States/Florida/1989
149	DNA-A: NC_025265	DNA-B: NC_025266	Tomato mottle wrinkle virus	ToMoWV	Argentina-Pichanal_400-2008
150	DNA-A: NC_002555	DNA-B: NC_002556	Tomato rugose mosaic virus	ToRMV	Brazil/Uberlandia 1/1996
151	DNA-A: NC_020257	DNA-B: NC_038234	Tomato rugose yellow leaf curl virus	TRYLCV	Uruguay/Salto Grande/U2/2009
152	DNA-A: NC_055570	DNA-B: NC_060101	Tomato vein clearing leaf deformation virus	ToVCLDeV	AR-Cordoba-Monte Cristo-Tom51-05
153	DNA-A: NC_055157	DNA-B: NC_055158	Tomato wrinkled mosaic virus	ToWMV	VE-Tru427-06
154	DNA-A: NC_005812	DNA-B: NC_005811	Tomato yellow leaf curl Kanchanaburi virus	TYLCKaV	Thailand/Kanchanaburi 1/2001
155	DNA-A: NC_000869	DNA-B: NC_000870	Tomato yellow leaf curl Thailand virus	TYLCTHV/A	Thailand/2/A
156	DNA-A: NC_055586	DNA_B: NC_060089	Tomato yellow leaf deformation dwarf virus	ToYLDeDV	BR-TO_83-08
157	DNA-A: NC_011348	DNA-B: NC_017913	Tomato yellow leaf distortion virus	ToYLDV	Cuba/5E17/2007
158	DNA-A: NC_005852	DNA-B: NC_005853	Tomato yellow margin leaf curl virus	ToYMLCV	Venezuela/Merida/57
159	DNA-A: NC_019946	DNA-B: NC_019947	Tomato yellow mottle virus	ToYMoV	Costa Rica/2003
160	DNA-A: NC_007726	DNA-B: NC_007727	Tomato yellow spot virus	ToYSV	Brazil/Bicas 2/1999
161	DNA-A: NC_010949	DNA-B: NC_010950	Tomato yellow vein streak virus	ToYVSV	Brazil/Potato/1983
162	DNA-A: NC_038983	DNA-B: NC_040188	Triumfetta yellow mosaic virus	TrYMV	Brazil-Msj1-2010
163	DNA-A: NC_055544	DNA-B: NC_060099	Verbena mottle virus	VMoV	CO-Valle-14
164	DNA-A: NC_003708	DNA-B: NC_003709	Watermelon chlorotic stunt virus	WmCSV	Yemen
165	DNA-A: NC_016575	DNA-B: NC_016576	West African Asystasia virus 1	WAAV1	West Africa/Asystasia1/2011
166	DNA-A: NC_077803	DNA-B: NC_077802	West African Asystasia virus 3	WAAV3	BJ-58-14
167	DNA-A: NC_010948	DNA-B: NC_010951	Wissadula golden mosaic virus	WGMV	Jamaica/St Thomas/2005
168	DNA-A: EU628631	-	Maize streak virus	MSV	Mali/Mic25/Digitaria/1987/G
169	DNA-A: NC_038445	-	Cowpea golden mosaic virus	CpGMV	Nigeria/Nsukka/1990
